# Supplementary material for: Radionuclide wiggle-matching reveals a non-synchronous Early Holocene climate oscillation in Greenland and Western Europe around a grand solar minimum
Source: Copernicus journal article supplement (doi:10.5194/cp-2019-125), 2019-11-04
Supplement: Supplementary file 1 [file cp-2019-125-supplement.pdf]

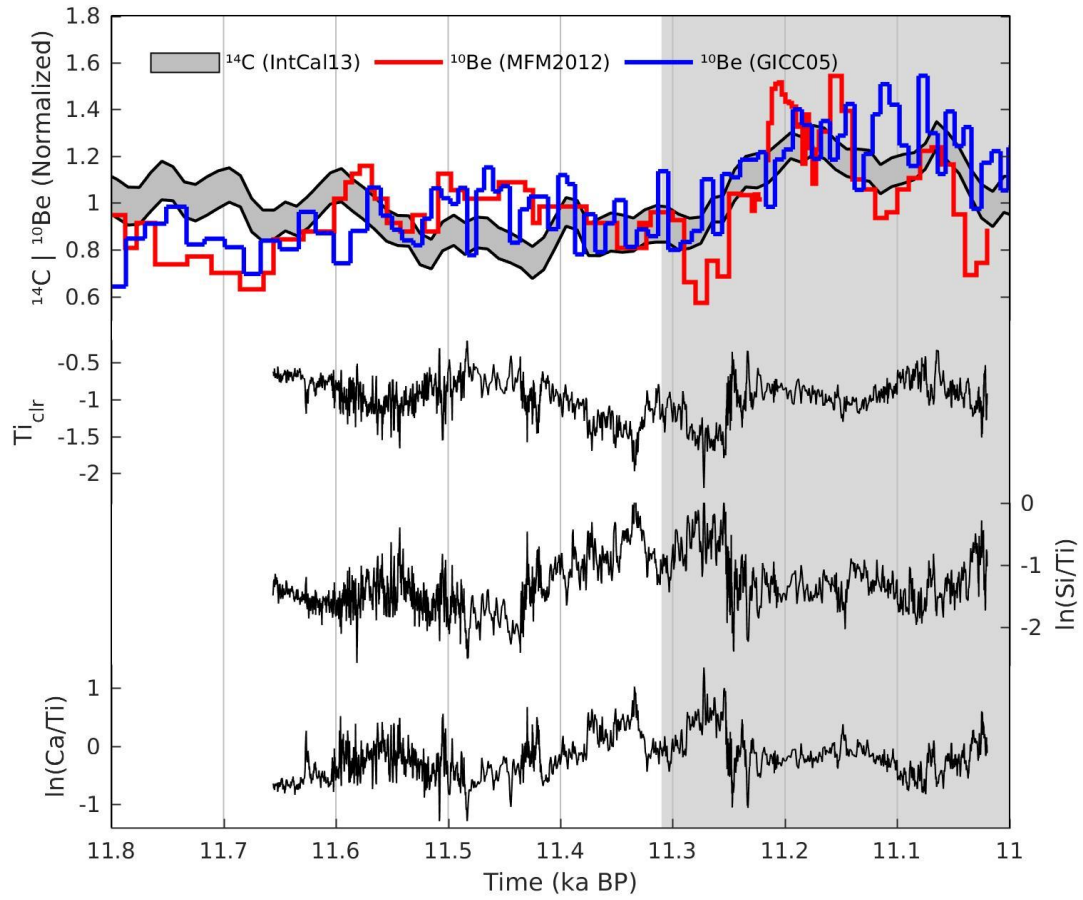

Sup. Figure 1: The three radionuclide records used in this study and the three  $\mu$ -XRF series (in black) from Martin-Puertas et al. (2017) for the period 11,800-11,000 years BP. The grey band represents the interval used (11,310-11,000 years BP) used for the correlation analysis in Fig. 5.

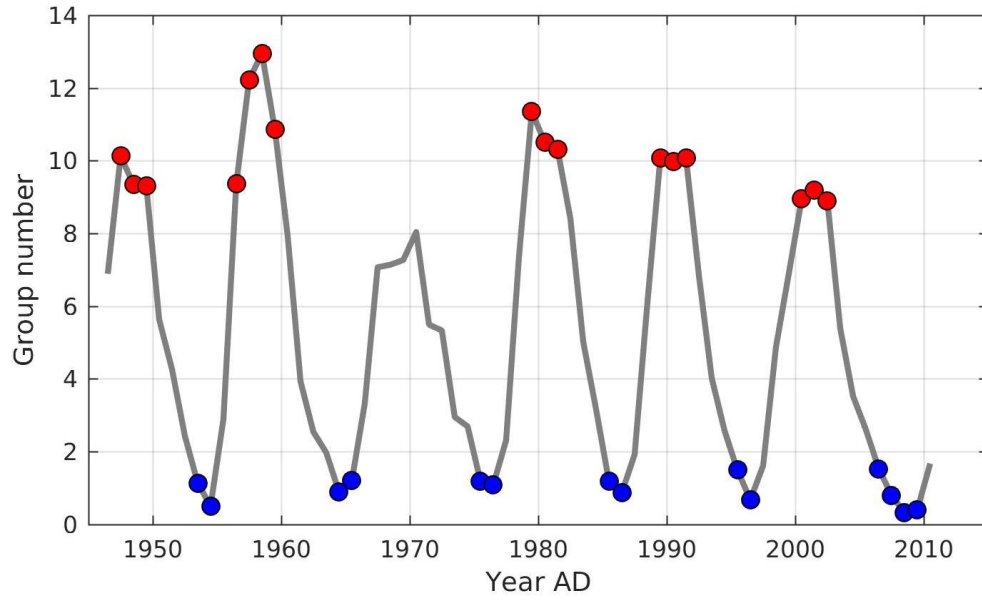

Sup. Figure 2: The selection of years with high solar activity (red) and low solar activity (blue) for the investigation of 20<sup>th</sup> century climate reanalysis (Fig. 6). The group sunspot number record (Svalgaard and Schatten, 2016) is plotted in grey while the red and blue circles denote years where the record reaches  $\pm 1\sigma$ , respectively.

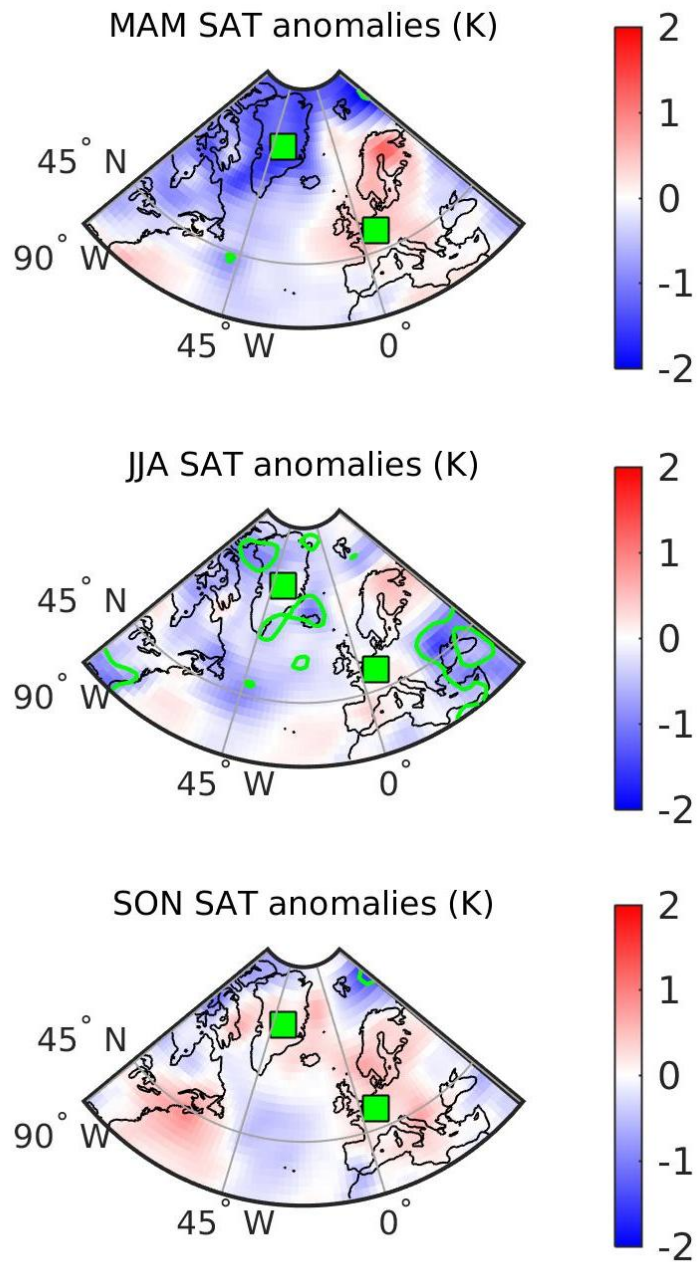

Sup. Figure 3: Seasonal surface air temperature (SAT) anomalies for solar maxima years compared to solar minima years for the period 1946-2011 in 20CR (as per Fig. 6 and Sup. Fig. 2). Spring months are on the top, Summer months are in the middle, and Fall months are on the bottom. Contour lines represent significance levels of  $p < 0.1$  (t-test).

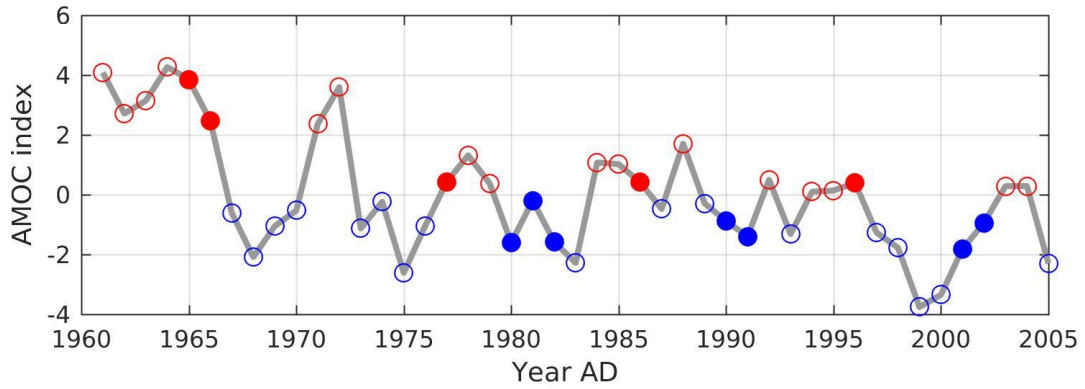

Sup. Figure 4: Years with a positive AMOC index (red circles) and years with a negative AMOC index (blue circles) for the investigation of 20CR in Fig. 7a. The reconstructed AMOC index time-series (Duchez et al., 2014) is plotted in grey. Filled circles represent the years where both a positive/negative AMOC and a solar minimum/maximum occur in parallel, as investigated in Fig. 7b.
